# Supplementary material for: Metabolic Subtypes and Biomarkers in Preterm and Term Neonates via Targeted Screening
Source: Research Square preprint supplement (doi:10.21203/rs.3.rs-8064129/v1), 2026-01-16
Supplement: Supplementary file 1 [file f1fab6a04631fd6ca761c5c4.docx]

- **Figure S1**: SAM plot (Delta = 0.7) identifying 27 significant metabolites with FDR = 0.004, supporting differential expression.
- **Figure S2**: EBAM plot identifying 35 significant metabolites with FDR = 0.006 (p0 = 0.275), confirming robust differential analysis.
- **Figure S3**: Recursive SVM classification error rate, decreasing from 14.9% (26 variables) to 28.8% (5 variables), optimizing feature selection.
- **Figure S4**: Random Forest error rates stabilizing below 0.1 with increasing trees, indicating model robustness (Overall: red, Preterm: green, Term: blue).
- **Figure S5**: Heatmap of metabolite concentrations across three clusters, with rows representing metabolites (e.g., arginine, glutamate, tyrosine) and columns grouped by clusters, using a color gradient from blue (low) to red (high).
- **Figure S6**: Boxplots showing distribution of key metabolite concentrations (e.g., arginine, glutamate) in preterm and term infants, corroborating pathway enrichment findings (FDR-adjusted p < 0.05).
